# Supplementary material for: Automated quantitative histology reveals vascular morphodynamics during Arabidopsis hypocotyl secondary growth
Source: eLife. 2014 Feb 11;3:e01567. doi: 10.7554/eLife.01567 (PMC3917233; doi:10.7554/eLife.01567)
Supplement: Supplementary file 1. — (A) An explanation of the extracted parameters that describe the cellular features. (B) Summary information of the hand-labeled training set for supervised machine learning. (C) Definition of the classifiers selected for analysis. (D) Summary of the classifier parameters for supervised machine learning. (E) Overview of the cell type classes recognized by the supervised machine learning approach and their assignment codes used in Data Files 3 and 4. DOI: http://dx.doi.org/10.7554/eLife.01567.012 [file elife01567s001.xlsx]

## Sheet: 1A
Supplementary File 1A. An explanation of the extracted parameters that describe the cellular features.
Feature	Description
m.cx	Cartesian coordinates of the center of mass x (in pixels)
m.cy	Cartesian coordinates of the center of mass y (in pixels)
xNew	Cartesian coordinates of the center of mass x calculated from the center of the section (in pixels)
yNew	Cartesian coordinates of the center of mass y calculated from the center of the section (in pixels)
radiusV	polar coordinates of the center of mass distance from the center (in pixels)
angleV	polar coordinates of the center of mass angle (in radians)
m.majoraxis	elliptical ﬁt major axis (in pixels)
m.eccentricity	elliptical eccentricity deﬁned by sqrt(1-majoraxis^2/minoraxis^2). Circle eccentricity is 0 and straight line eccentricity is 1.
m.theta	angle between the major axis of a cell and the x axis (in radians)
s.area	cell area (pixels2)
s.perimeter	cell perimeter (in pixels)
s.radius.mean	cell average radius (in pixels)
s.radius.min	cell min radius (in pixels)	-
s.radius.max	cell max radius (in pixels)	-
extV	cell extension sqrt(majoraxis * minaxis) (in pixels)
inclV	incline angle, angle between the majoraxis and the radius positon (in radians)

## Sheet: 1B
Supplementary File 1B. Summary information of the hand-labeled training set for supervised machine learning.
genotype	age (in dag)	# sections	total cells labeled	Xy	Fi	Cb	PhB	PhP
Col	15	1	151	42	0	18	30	35
Col	20	2	522	108	0	63	127	159
Col	25	2	414	125	0	53	78	119
Col	30	1	229	84	30	27	37	51
Col	35	2	504	152	73	57	96	126
Ler	15	2	154	58	0	19	47	30
Ler	20	2	285	84	0	48	79	74
Ler	25	1	156	47	8	20	36	45
Ler	30	2	354	93	56	53	74	78
Ler	35	2	375	124	95	28	66	62

## Sheet: 1C
Supplementary File 1C. Definition of the classifiers selected for analysis.
		classifier used:
genotype	age (in dag)	cost	gamma	feature list	feature description
Col	15	20	0.1	radiusV; m.majoraxis;	polar coordinates of the center of mass distance from the center (in pixels); elliptical ﬁt major axis (in pixels);
Col	20	20	0.1	xNew; yNew; m.cx; m.cy; m.theta; s.area;	Cartesian coordinates of the center of mass x calculated from the center of the section (in pixels); Cartesian coordinates of the center of mass y calculated from the center of the section (in pixels); Cartesian coordinates of the center of mass x (in pixels); Cartesian coordinates of the center of mass y (in pixels); angle between the major axis of a cell and the x axis (in radians); cell area (…
Col	25	20	0.1	radiusV; m.majoraxis; m.eccentricity; m.theta; s.area; inclV;	polar coordinates of the center of mass distance from the center (in pixels); elliptical ﬁt major axis (in pixels); elliptical eccentricity deﬁned by sqrt(1-majoraxis^2/minoraxis^2). Circle eccentricity is 0 and straight line eccentricity is 1; angle between the major axis of a cell and the x axis (in radians); cell area (pixels2); incline angle, angle between the majoraxis and the radius positon…
Col	30	20	1	m.majoraxis; inclV;	elliptical ﬁt major axis (in pixels); incline angle, angle between the majoraxis and the radius positon (in radians);
Col	35	20	0.1	s.radius.max; inclV;	cell max radius (in pixels); incline angle, angle between the majoraxis and the radius positon (in radians);
Ler	15	200	0.1	radiusV; m.majoraxis;	polar coordinates of the center of mass distance from the center (in pixels); elliptical ﬁt major axis (in pixels);
Ler	20	20	1	radiusV; s.perimeter;	polar coordinates of the center of mass distance from the center (in pixels); cell perimeter (in pixels);
Ler	25	200	0.1	radiusV; s.perimeter; inclV;	polar coordinates of the center of mass distance from the center (in pixels); cell perimeter (in pixels); incline angle, angle between the majoraxis and the radius positon (in radians);
Ler	30	20	0.1	m.majoraxis; inclV;	elliptical ﬁt major axis (in pixels); incline angle, angle between the majoraxis and the radius positon (in radians);
Ler	35	20	0.1	m.majoraxis; inclV;	elliptical ﬁt major axis (in pixels); incline angle, angle between the majoraxis and the radius positon (in radians);

## Sheet: 1D
Supplementary File 1D. Summary of the classifier parameters for supervised machine learning.
genotype	age (in dag)	cost	gamma	feature list	% accuracy (averaged)	% accuracy (Xy)	% accuracy (Fi)	% accuracy (Cb)	% accuracy PhB	% accuracy PhP
Col	15	20	0.1	radiusV;m.majoraxis	100	100	#	100	100	100
Col	20	20	0.1	xNew;yNew;m.cx;m.cy;m.theta;s.area	99.5	100	#	100	98	100
Col	25	20	0.1	radiusV;m.majoraxis;m.eccentricity;m.theta;s.area;inclV	98.75	100	#	100	100	95
Col	30	20	1	m.majoraxis;inclV	82.2	65	90	75	100	81
Col	35	20	0.1	s.radius.max;inclV	78	41	95	98	*	85*
Ler	15	200	0.1	radiusV;m.majoraxis	80	90	#	93	93	44
Ler	20	20	1	radiusV;s.perimeter	95	100	#	84	96	100
Ler	25	200	0.1	radiusV;s.perimeter;inclV	86.8	94	80	83	77	100
Ler	30	20	0.1	m.majoraxis;inclV	86	75	95	94	75	91
Ler	35	20	0.1	m.majoraxis;inclV	75	40	97	88	*	80*
# Fibers were not yet present at these time points.
* At 35 dag, phloem bundle cells could not be reliably identified in Col-0 whitout overfitting our classifiers (i.e. overfit classifiers generalize poorly on the running set despite high accuracy). We thus included them in the phloem parenchyma category. For consistency, Ler was treated similarly.

## Sheet: 1E
Supplementary File 1E. Overview of the cell type classes recognized by the supervised machine learning approach and their assignment codes used in Data Files 3 & 4.
Class	Description	Code
Xy	xylem vessels and xylem parenchyma cells	2
Fi	fibers	4
Cb	cambium	6
PhB	phloem bundles	8
PhP	phloem parenchyma cells	9
