# Supplementary material for: Automated quantitative histology reveals vascular morphodynamics during Arabidopsis hypocotyl secondary growth
Source: eLife. 2014 Feb 11;3:e01567. doi: 10.7554/eLife.01567 (PMC3917233; doi:10.7554/eLife.01567)
Supplement: Supplementary file 2. — Quality control files for the Col-0 sections. DOI: http://dx.doi.org/10.7554/eLife.01567.013 [file elife01567s002.xlsx]

## Sheet: Sankar_2013_Tab_S7.txt
_A.tif is whole section area, _X.tif is xylem area
fn	age	patterns	m.cx	m.cy	m.majoraxis	m.eccentricity	m.theta	s.area	s.perimeter	s.radius.mean	s.radius.min	s.radius.max
Col_15d_block1_1_3_A.tif	15d	_A.tif	1495.5	1646.36	1920.88	0.470033	-1.19848	2551125	5675	901.417	802.196	1001.14
Col_15d_block1_10_1_A.tif	15d	_A.tif	1631.94	1515.07	1987.86	0.520846	-0.815908	2644789	5577	918.913	830.327	1009.25
Col_15d_block1_13_1_A.tif	15d	_A.tif	1530.51	1527.93	1672.28	0.544449	0.915015	1837680	4756	766.267	677.873	880.684
Col_15d_block1_16_1_A.tif	15d	_A.tif	1503.22	1545.47	2022.33	0.328623	0.975785	3028507	6101	982.195	901.597	1067.6
Col_15d_block1_17_2_A.tif	15d	_A.tif	1449.04	1607.67	1903.2	0.439486	-0.525968	2550451	5530	902.061	832.374	986.425
Col_15d_block1_3_2_A.tif	15d	_A.tif	1459.95	1600.48	2035.67	0.285856	0.689605	3112167	6310	994.87	902.811	1057.4
Col_15d_block1_5_2_A.tif	15d	_A.tif	1509.73	1457.56	1548.92	0.428873	1.3051	1693658	4659	733.585	645.474	812.944
Col_15d_block1_9_2_A.tif	15d	_A.tif	1550.93	1500.18	1971.69	0.336412	-1.24444	2864995	6021	954.494	870.117	1030.77
Col_15d_block2_10_1_A.tif	15d	_A.tif	1557.31	1543.81	2213.74	0.5163	1.20748	3289779	6115	1024.99	904.808	1128.73
Col_15d_block2_14_1_A.tif	15d	_A.tif	1575.88	1561.06	2058.38	0.439326	-1.29092	2979016	5817	973.956	866.148	1052.71
Col_15d_block2_15_1_A.tif	15d	_A.tif	1465.2	1717.09	1697.23	0.465637	0.384392	1997322	4815	798.461	726.105	884.838
Col_15d_block2_16_1_A.tif	15d	_A.tif	1452.55	1584.51	2291.5	0.456703	0.368181	3666047	6339	1080.44	998.125	1182.12
Col_15d_block2_2_1_A.tif	15d	_A.tif	1485.81	1606.63	1685.68	0.337046	0.940092	2091082	4816	816.039	756.492	904.532
Col_15d_block2_6_1_A.tif	15d	_A.tif	1432.35	1584.89	1672.14	0.433398	0.0605319	1972468	4691	792.125	704.571	863.62
Col_15d_block2_7_1_A.tif	15d	_A.tif	1502.99	1585.04	2061.01	0.25815	-0.275504	3220131	5885	1011.52	959.207	1059.19
Col_15d_block2_8_1_A.tif	15d	_A.tif	1558.09	1571.37	2179.35	0.508573	-0.810535	3191752	5983	1009.98	904.205	1146.97
Col_15d_block2_9_1_A.tif	15d	_A.tif	1599.48	1621.48	2341.5	0.471452	1.33084	3793597	6535	1099.59	1008.04	1184.4
Col_20d_block1_1_1_A.tif	20d	_A.tif	2610.68	2550.05	4529.18	0.251061	-0.352189	15574471	13123	2225.72	2098.97	2371.91
Col_20d_block1_10_1_A.tif	20d	_A.tif	2633.54	2541.08	4385.24	0.377684	1.01104	13970918	13097	2109	1952.93	2270.04
Col_20d_block1_11_1_A.tif	20d	_A.tif	2614.26	2630.36	4569.79	0.338663	1.28934	15400848	13524	2215.67	2058.53	2360.81
Col_20d_block1_12_1_A.tif	20d	_A.tif	2583.91	2708.82	3822.21	0.331894	-1.39732	10803901	11189	1854.96	1736.39	1973.52
Col_20d_block1_13_1_A.tif	20d	_A.tif	2636.01	2721.96	4323.78	0.367063	-0.816315	13646509	12454	2084.24	1976.77	2225.35
Col_20d_block1_14_1_A.tif	20d	_A.tif	2631.73	2658.34	4442.5	0.341156	1.52638	14550937	13210	2153.33	2018.25	2297
Col_20d_block1_15_1_A.tif	20d	_A.tif	2603.98	2669.61	3705.52	0.33888	0.740514	10141461	10817	1797.32	1674.54	1893.77
Col_20d_block1_16_1_A.tif	20d	_A.tif	2563.29	2763.39	4343.58	0.309422	-0.484909	14081764	12273	2117	2027.52	2218.76
Col_20d_block1_17_1_A.tif	20d	_A.tif	2543.82	2675.08	4282.11	0.297678	-1.15611	13738611	12487	2091.56	1993.5	2198.02
Col_20d_block1_18_A.tif	20d	_A.tif	2640.94	2563.25	3549.25	0.398028	-0.213298	9061846	10484	1698.5	1571.6	1843.49
Col_20d_block1_19_A.tif	20d	_A.tif	2640.48	2610.68	3798.03	0.267332	0.242013	10909848	11012	1863.22	1779.84	1949.07
Col_20d_block1_2_1_A.tif	20d	_A.tif	2567.22	2556.74	3941.49	0.354204	0.461984	11392351	11019	1906.01	1782.66	2023.67
Col_20d_block1_20_A.tif	20d	_A.tif	2587.34	2676.96	4244.5	0.367793	-0.810818	13147873	12760	2046.39	1920.31	2206.68
Col_20d_block1_21_A.tif	20d	_A.tif	2559.91	2698.93	4263.73	0.367254	-0.43328	13262606	12259	2055.04	1933.39	2192.98
Col_20d_block1_3_1_A.tif	20d	_A.tif	2521.01	2484.06	3889.54	0.33952	-1.43493	11168168	11155	1886.62	1787.24	2004.25
Col_20d_block1_4_1_A.tif	20d	_A.tif	2507.03	2689.14	3936.69	0.239425	-0.705593	11808044	11493	1938.37	1848.5	2015.26
Col_20d_block1_5_1_A.tif	20d	_A.tif	2612.56	2615.31	4190.56	0.36783	-0.451939	12806111	11672	2020.91	1858.99	2154.16
Col_20d_block1_6_1_A.tif	20d	_A.tif	2504.56	2524.82	4577.63	0.208209	-0.79061	16084135	14164	2262.89	2166.86	2339.3
Col_20d_block1_7_1_A.tif	20d	_A.tif	2330.09	2556	4149.56	0.256145	0.38649	13050223	12645	2037.66	1916.54	2226.16
Col_20d_block1_8_1_A.tif	20d	_A.tif	2531.12	2515.04	3769.08	0.261444	0.884125	10754825	11050	1850.66	1715.84	1922.7
Col_20d_block1_9_1_A.tif	20d	_A.tif	2327.88	2701.96	4367.81	0.412657	-0.573421	13621539	12342	2082.15	1841.87	2242.88
Col_20d_block2_1_1_A.tif	20d	_A.tif	2662	2542.88	4627.52	0.436003	-1.41424	15127095	12754	2196.85	2059.41	2394.22
Col_20d_block2_10_2_A.tif	20d	_A.tif	2640.24	2533.13	3877.13	0.351547	-1.47203	11025334	10842	1873.93	1751.78	2017.61
Col_20d_block2_11_1_A.tif	20d	_A.tif	2744.55	2759.82	4844.14	0.422867	-0.000428137	16682915	13420	2305.28	2139.43	2482.81
Col_20d_block2_12_1_A.tif	20d	_A.tif	2592.86	2793.28	4317.91	0.268204	0.431274	14098191	12532	2118.11	2042.02	2224.29
Col_20d_block2_13_1_A.tif	20d	_A.tif	2614.73	2504.37	3911.25	0.406124	0.989106	10971031	10944	1869.16	1770.46	2000.44
Col_20d_block2_14_1_A.tif	20d	_A.tif	2404.81	2711.57	3933.99	0.37568	-1.4516	11253198	11087	1893.02	1786.63	2033.67
Col_20d_block2_15_2_A.tif	20d	_A.tif	2504.61	2609.39	4310.24	0.424204	-1.53068	13184400	12140	2049.27	1874.43	2243.72
Col_20d_block2_16_1_A.tif	20d	_A.tif	2566.39	2621.8	4266.16	0.392823	0.80217	13113568	12007	2044.12	1902.34	2245.82
Col_20d_block2_17_1_A.tif	20d	_A.tif	2576.89	2656.95	3917.94	0.363404	-0.0157542	11223428	10965	1889.78	1759.68	2002.71
Col_20d_block2_18_1_A.tif	20d	_A.tif	2612.01	2527.54	4055.03	0.342825	-1.31432	12121114	11540	1964.47	1857.59	2097.32
Col_20d_block2_19_2_A.tif	20d	_A.tif	2490.65	2486	4226.33	0.404791	0.293036	12809598	11800	2019.85	1879.98	2218.8
Col_20d_block2_2_1_A.tif	20d	_A.tif	2657.92	2644.27	4654.18	0.38952	0.246493	15655463	12966	2231.59	2116.73	2385.84
Col_20d_block2_3_1_A.tif	20d	_A.tif	2624.25	2501.31	4153.75	0.338006	0.789682	12745444	11721	2014.97	1922.57	2136.74
Col_20d_block2_6_1_A.tif	20d	_A.tif	2594.38	2288.45	4218.53	0.264025	0.90851	13468205	12003	2069.91	1996.8	2184.51
Col_20d_block2_7_1_A.tif	20d	_A.tif	2520.99	2628.56	4160.39	0.262444	1.27945	13112154	11906	2042.24	1946.79	2119.24
Col_20d_block2_8_1_A.tif	20d	_A.tif	2625.92	2629.01	3586.15	0.174649	-0.0533922	9934346	10454	1776.55	1719.12	1835.04
Col_20d_block2_9_1_A.tif	20d	_A.tif	2598.6	2403.73	4920.52	0.411284	0.383268	17306276	13797	2346.71	2175.32	2532.6
Col_25d_block1_1_1_A.tif	25d	_A.tif	4087.44	3958.35	6790.49	0.331103	0.509333	34140382	19263	3298.42	3131.64	3480.23
Col_25d_block1_10_1_A.tif	25d	_A.tif	3455.86	3602.34	6547.16	0.337178	0.789158	31669213	18643	3175.22	2989.55	3343.26
Col_25d_block1_12_1_A.tif	25d	_A.tif	3888.07	4197.88	7176.58	0.300945	0.873928	38555090	20718	3503.2	3348.96	3662.14
Col_25d_block1_13_1_A.tif	25d	_A.tif	3977.48	4541.2	6463.16	0.218274	-0.85276	32003110	18745	3192.34	3048.06	3274.06
Col_25d_block1_14_1_A.tif	25d	_A.tif	4207.23	4423.81	7620.12	0.212929	-0.0961632	44526092	21869	3765	3625.56	3934.11
Col_25d_block1_2_1_A.tif	25d	_A.tif	4134.81	4143.08	7993.92	0.315883	0.997372	47587494	22782	3893.01	3744.27	4104.48
Col_25d_block1_4_1_A.tif	25d	_A.tif	4245.41	4204.93	7201.2	0.344506	0.134389	38206129	20471	3489.38	3355.2	3694.35
Col_25d_block1_6_1_A.tif	25d	_A.tif	3172.47	3132.9	6156.89	0.246464	-0.768069	28828078	17777	3027.74	2851.24	3135.49
Col_25d_block1_7_1_A.tif	25d	_A.tif	3700.56	3928.15	6459.24	0.187751	0.10674	32129634	18549	3199.92	3049.31	3354.29
Col_25d_block1_8_1_A.tif	25d	_A.tif	3640.74	3674.17	6879.53	0.176458	1.07517	36565513	20086	3411.97	3287.61	3514.02
Col_25d_block2_1_1_A.tif	25d	_A.tif	4170.96	3995.85	5923.37	0.148974	-1.3944	27227019	17251	2942.67	2851.73	3066.87
Col_25d_block2_2_1_A.tif	25d	_A.tif	4448.7	4117.67	7851.17	0.213019	-0.540917	47179211	22264	3878.28	3658.06	4195.9
Col_25d_block2_3_1_A.tif	25d	_A.tif	4148.33	3965.79	6627.62	0.274756	-1.46169	33122323	18794	3248.42	3106.64	3477.16
Col_25d_block2_4_1_A.tif	25d	_A.tif	3997.13	3913.4	7113.07	0.386296	-0.0464162	36578842	19727	3414.9	3194.9	3684.79
Col_25d_block3_1_1_A.tif	25d	_A.tif	3102.09	3743.79	6350.08	0.453093	1.14891	28209882	17596	2998.75	2764.26	3248.6
Col_25d_block3_10_1_A.tif	25d	_A.tif	4182.69	4068.72	6837.83	0.456696	0.988576	32611651	18856	3226.43	2968.99	3565.09
Col_25d_block3_3_1_A.tif	25d	_A.tif	3259.16	3154.95	5420.13	0.272137	-1.51015	22184160	15300	2657.95	2553.97	2777.95
Col_25d_block3_5_1_A.tif	25d	_A.tif	3498.75	3613.59	5889.31	0.481625	0.88259	23822663	15996	2759.09	2468.05	3019.86
Col_25d_block3_6_1_A.tif	25d	_A.tif	3635.22	3573.32	5807.65	0.210558	1.22829	25887385	16751	2870.61	2759.54	2968.21
Col_25d_block3_7_1_A.tif	25d	_A.tif	4214.71	3898.49	7644.04	0.217018	1.56889	44757154	22134	3773.61	3624.47	3933.19
Col_25d_block3_8_1_A.tif	25d	_A.tif	3922.89	4230.38	6136.76	0.267891	0.824096	28465192	17244	3012.5	2855.58	3157.68
Col_25d_block3_9_1_A.tif	25d	_A.tif	4006.58	3854.29	6896.4	0.366716	0.0434601	34722729	19415	3323.87	3133.66	3538.66
Col_30d_block1_1_1_A.tif	30d	_A.tif	5313.94	5082.23	9250.23	0.242272	0.359737	65156777	26749	4556.15	4335.85	4698.44
Col_30d_block1_10_1_A.tif	30d	_A.tif	5020.91	5033.93	9090.23	0.354517	-0.514875	60633353	25561	4394.94	4166.12	4641.08
Col_30d_block1_10_2_A.tif	30d	_A.tif	5046.47	4927.3	9043.88	0.362457	-0.570775	59822907	25582	4363.36	4129.61	4634.97
Col_30d_block1_11_1_A.tif	30d	_A.tif	5061.84	5018.02	8464.16	0.288365	-0.899381	53815688	24412	4136.91	3921.69	4409.52
Col_30d_block1_12_1_A.tif	30d	_A.tif	5429.39	5190.35	8831.88	0.329651	0.630693	57815033	24873	4290.37	4089.65	4532.54
Col_30d_block1_13_1_A.tif	30d	_A.tif	5344.48	5191.86	9063.32	0.324257	-1.37369	60975073	25611	4407.83	4164.35	4651.21
Col_30d_block1_14_1_A.tif	30d	_A.tif	5000.2	4962.47	9486.34	0.293193	1.07053	67519382	26836	4639.45	4410.07	4845.1
Col_30d_block1_15_1_A.tif	30d	_A.tif	4893.62	5131.55	7924.42	0.354831	0.676964	46075216	22505	3830.84	3665.55	4087.93
Col_30d_block1_2_1_A.tif	30d	_A.tif	5271.76	5021.23	9068.97	0.326734	0.938306	60998819	26012	4407.18	4183.98	4649.92
Col_30d_block1_3_1_A.tif	30d	_A.tif	5137.59	4935.11	9110.87	0.425865	-0.450373	58939809	25459	4334.5	4024.14	4666.15
Col_30d_block1_4_1_A.tif	30d	_A.tif	5095.64	5265.75	9159.42	0.344471	-0.544925	61805035	26427	4434.52	4239.26	4707.36
Col_30d_block1_5_1_A.tif	30d	_A.tif	5165.95	5208.49	9486.86	0.192311	-1.3609	69278649	27462	4698.34	4467.26	4920.36
Col_30d_block1_6_1_A.tif	30d	_A.tif	4985.49	5145.98	8625.46	0.281715	-0.827552	56006079	25262	4223.63	4027.03	4443.07
Col_30d_block1_7_1_A.tif	30d	_A.tif	5397.91	4958.05	9174.41	0.319404	-0.891213	62592362	26189	4464.56	4248.1	4675.62
Col_30d_block1_8_1_A.tif	30d	_A.tif	5071.33	4850.36	8529.52	0.370424	-1.10167	53016783	24499	4110.45	3853.43	4493.27
Col_30d_block1_9_1_A.tif	30d	_A.tif	5533.23	5186.23	9465.88	0.398836	0.908294	64508761	26791	4535.04	4275.74	4850.79
Col_30d_block3_1_1_A.tif	30d	_A.tif	4849.96	5207.56	8895.6	0.412315	0.640513	56588998	24657	4249.37	3968.83	4545.57
Col_30d_block3_21_1_A.tif	30d	_A.tif	5215.28	5197.38	8388.99	0.273614	1.36552	53099331	23413	4113.44	3902.02	4305.35
Col_30d_block3_7_1_A.tif	30d	_A.tif	4833.13	4836.56	9852.8	0.246858	0.566305	73805660	28502	4842.68	4665.01	5074.84
Col_35d_block1_3_2_A.tif	35d	_A.tif	6187.78	6207.1	9288.63	0.437784	1.43502	60877770	25832	4405.79	4124.3	4842.61
Col_35d_block1_6_2_A.tif	35d	_A.tif	6031.64	6202.84	10261.6	0.322999	-0.298958	78203428	29146	4992.15	4802.56	5295.15
Col_35d_block1_8_1_A.tif	35d	_A.tif	6031.68	6092.12	10283.2	0.347796	-0.959953	77788036	29296	4975.53	4750.92	5311.86
Col_35d_block1_9_1_A.tif	35d	_A.tif	6080.68	6075.03	9187.72	0.39964	0.700755	60687095	26089	4399.11	4101.34	4805.1
Col_35d_block2_1_1_A.tif	35d	_A.tif	5656.65	5833.37	10757.9	0.336454	-1.51476	85351969	30116	5216.36	4799.26	5604.12
Col_35d_block2_4_1_A.tif	35d	_A.tif	5976.02	6517.15	11189	0.254096	0.280127	94988139	31963	5501.82	5252.71	5829.56
Col_35d_block3_1_4_A.tif	35d	_A.tif	5492.8	5713.39	9929.82	0.259825	-0.741908	74714057	28810	4878.18	4646.65	5106.43
Col_35d_block3_2_1_A.tif	35d	_A.tif	6459.77	6168.32	9660.83	0.39672	-1.34023	67202953	27065	4632.54	4385.66	4973.82
Col_35d_block3_7_1_A.tif	35d	_A.tif	5981.23	5824.04	11018.5	0.211706	0.429746	93083608	31847	5442.12	5194.02	5710.06
Col_35d_block4_1_1_A.tif	35d	_A.tif	6712.43	6155.42	10106.6	0.412926	-0.490329	73020018	28968	4821.72	4515.13	5147.16
Col_35d_block4_2_2_A.tif	35d	_A.tif	6363.73	5867.41	10266	0.244974	0.234692	80141433	29903	5049.46	4726.25	5331.67
Col_35d_block4_4_1_A.tif	35d	_A.tif	6095.6	5623.87	9967.85	0.317662	-1.32858	73889435	28606	4850.68	4609.91	5119.85
Col_35d_block4_5_2_A.tif	35d	_A.tif	6141.83	6364.21	10525.6	0.335318	1.43824	81885096	30055	5109.54	4839.67	5411.02
Col_35d_block4_6_1_A.tif	35d	_A.tif	6389.38	6265.25	10453.5	0.423772	-1.25789	77664036	29292	4973.52	4467.44	5356.99
Col_35d_block4_9_1_A.tif	35d	_A.tif	6191.88	5958.66	11876.6	0.148385	1.10085	109461720	32768	5892.63	5536.78	6318.25
Col_15d_block1_1_3_X.tif	15d	_X.tif	1493.89	1622.35	654.919	0.312327	0.46593	313180	2078	316.364	259.413	364.215
Col_15d_block1_10_1_X.tif	15d	_X.tif	1583.88	1520.21	673.965	0.196957	0.247734	340454	2262	329.459	256.417	382.027
Col_15d_block1_13_1_X.tif	15d	_X.tif	1554.27	1546.29	584.862	0.521891	0.802279	223149	1832	267.052	214.331	328.236
Col_15d_block1_16_1_X.tif	15d	_X.tif	1535.38	1564.41	789.694	0.333845	0.304001	455328	2655	382.273	332.416	444.633
Col_15d_block1_17_2_X.tif	15d	_X.tif	1485.12	1563.66	647.98	0.316958	-1.1722	306369	2212	312.754	251.638	354.818
Col_15d_block1_3_2_X.tif	15d	_X.tif	1460.27	1611.36	691.615	0.330087	-0.356514	341679	2341	331.297	263.362	407.731
Col_15d_block1_5_2_X.tif	15d	_X.tif	1471.3	1455.54	631.044	0.579367	0.45749	252876	1886	284.478	233.92	339.965
Col_15d_block1_9_2_X.tif	15d	_X.tif	1580.87	1541.35	670.634	0.254304	-0.00395644	336477	2334	327.069	264.726	373.348
Col_15d_block2_10_1_X.tif	15d	_X.tif	1565.92	1553.72	734.193	0.586813	0.340814	338083	2145	328.442	249.867	379.022
Col_15d_block2_14_1_X.tif	15d	_X.tif	1571.55	1626.34	724.425	0.344661	0.959259	377970	2372	347.268	278.827	413.295
Col_15d_block2_15_1_X.tif	15d	_X.tif	1449.46	1693.52	655.037	0.328813	-0.621584	313570	2099	316.066	264.263	365.254
Col_15d_block2_16_1_X.tif	15d	_X.tif	1473.25	1569.3	730.941	0.394193	0.795482	381387	2209	348.561	310.13	389.183
Col_15d_block2_2_1_X.tif	15d	_X.tif	1499.61	1612.39	652.216	0.412204	-0.0762078	302692	1949	310.227	273.831	337.901
Col_15d_block2_6_1_X.tif	15d	_X.tif	1476.4	1586.67	634.03	0.382892	0.99862	288124	1923	302.707	251.199	346.174
Col_15d_block2_7_1_X.tif	15d	_X.tif	1494	1584.52	684.273	0.424677	0.903278	330263	2038	324.189	284.66	367.528
Col_15d_block2_8_1_X.tif	15d	_X.tif	1573.48	1610.25	711.831	0.33181	1.54322	369201	2184	343.189	285.028	405.729
Col_15d_block2_9_1_X.tif	15d	_X.tif	1586.32	1668.53	751.847	0.606713	-0.914132	351308	2145	335.031	283.082	393.618
Col_20d_block1_1_1_X.tif	20d	_X.tif	2620.75	2532.01	1223.1	0.42367	0.380812	1044066	4442	573.101	397.321	690.649
Col_20d_block1_10_1_X.tif	20d	_X.tif	2563.46	2542.1	1296.92	0.474578	1.44025	1117359	4718	586.693	350.534	722.769
Col_20d_block1_11_1_X.tif	20d	_X.tif	2630.35	2604.48	1394.88	0.494	0.313499	1292912	4720	642.125	434.727	731.701
Col_20d_block1_12_1_X.tif	20d	_X.tif	2554.74	2686.92	1134.26	0.465488	-1.03829	839134	3888	518.941	333.774	636.492
Col_20d_block1_13_1_X.tif	20d	_X.tif	2611.07	2717.59	1239.57	0.399482	-0.167101	1084818	4678	584.249	435.269	703.769
Col_20d_block1_14_1_X.tif	20d	_X.tif	2620.71	2578.19	1328.91	0.45618	-1.13819	1186261	5672	593.698	330.889	776.803
Col_20d_block1_15_1_X.tif	20d	_X.tif	2669.32	2616.25	1083.81	0.429039	0.326259	803686	4573	501.18	312.545	616.083
Col_20d_block1_16_1_X.tif	20d	_X.tif	2620.83	2761.75	1102.47	0.400293	0.923166	848189	4230	514.577	365.509	645.131
Col_20d_block1_17_1_X.tif	20d	_X.tif	2612.68	2635.63	1206.47	0.328961	-0.998422	1054858	4320	580.139	486.916	670.241
Col_20d_block1_18_X.tif	20d	_X.tif	2658.24	2559.05	1132	0.49731	0.295723	862382	3675	523.354	425.942	646.01
Col_20d_block1_19_X.tif	20d	_X.tif	2662.83	2570.31	1186.99	0.504902	-0.0645777	926620	4550	542.986	373.679	650.63
Col_20d_block1_2_1_X.tif	20d	_X.tif	2636.58	2651.49	1017.76	0.366607	0.295992	743886	3339	484.307	348.407	539.744
Col_20d_block1_20_X.tif	20d	_X.tif	2559.84	2627.89	1149.7	0.19313	-0.550075	951411	5295	542.004	292.488	715.282
Col_20d_block1_21_X.tif	20d	_X.tif	2529.55	2589.35	1157.9	0.547486	0.290376	830974	3986	514.006	342.759	671.797
Col_20d_block1_3_1_X.tif	20d	_X.tif	2589.05	2520.49	1130.83	0.391496	1.15794	914568	3884	539.268	432.727	625.801
Col_20d_block1_4_1_X.tif	20d	_X.tif	2520.89	2680.03	1157.91	0.506835	-0.685505	884766	3943	532.067	426.264	667.092
Col_20d_block1_5_1_X.tif	20d	_X.tif	2629.21	2717.22	1161.1	0.586646	0.189307	844819	3709	520.706	434.275	629.903
Col_20d_block1_6_1_X.tif	20d	_X.tif	2572.19	2505.57	1267.86	0.367779	1.08963	1149563	4693	605.953	490.941	711.717
Col_20d_block1_7_1_X.tif	20d	_X.tif	2460.23	2592.26	1145.96	0.255018	-0.508944	972391	4148	555.807	430.119	648.047
Col_20d_block1_8_1_X.tif	20d	_X.tif	2578.76	2577.27	1266.55	0.512544	-0.45808	1048749	4134	576.097	417.687	703.035
Col_20d_block1_9_1_X.tif	20d	_X.tif	2465.05	2680.83	1201.02	0.244255	-1.21977	1080006	4076	586.999	500.091	664.425
Col_20d_block2_1_1_X.tif	20d	_X.tif	2646.4	2541.64	1344.83	0.344268	0.355645	1326906	4165	650.287	578.54	721.497
Col_20d_block2_10_2_X.tif	20d	_X.tif	2540.05	2524.05	1299	0.418514	1.10855	1200792	3792	618.591	562.035	669.483
Col_20d_block2_11_1_X.tif	20d	_X.tif	2627.48	2745.23	1313.15	0.331752	0.553945	1270799	3960	636.25	564.545	694.997
Col_20d_block2_12_1_X.tif	20d	_X.tif	2596	2862.38	1394.42	0.552081	0.517292	1268582	3948	637.064	540.548	721.13
Col_20d_block2_13_1_X.tif	20d	_X.tif	2540.52	2602.57	1276.93	0.462573	1.20923	1127585	3823	601.38	526.763	705.628
Col_20d_block2_14_1_X.tif	20d	_X.tif	2535.66	2627.54	1143.23	0.188733	1.32303	998520	3511	563.376	501.78	630.382
Col_20d_block2_15_2_X.tif	20d	_X.tif	2578.77	2676.73	1279.06	0.436803	-1.52272	1152368	3768	605.549	535.485	654.511
Col_20d_block2_16_1_X.tif	20d	_X.tif	2505.15	2718.63	1246.41	0.402684	-0.403642	1109863	3657	594.035	501.774	651.679
Col_20d_block2_17_1_X.tif	20d	_X.tif	2525.64	2649.12	1242.24	0.420461	1.07153	1092704	3679	589.981	504.092	647.638
Col_20d_block2_18_1_X.tif	20d	_X.tif	2575.49	2558.17	1349.24	0.415196	1.2515	1294757	3912	642.199	568.633	703.988
Col_20d_block2_19_2_X.tif	20d	_X.tif	2515.03	2555.11	1421.54	0.452345	0.298033	1411600	4007	669.883	563.337	749.809
Col_20d_block2_2_1_X.tif	20d	_X.tif	2656.09	2649.48	1368.42	0.461666	-0.156415	1297431	4052	642.939	553.438	707.047
Col_20d_block2_3_1_X.tif	20d	_X.tif	2624.81	2528.87	1256.26	0.260691	1.49584	1188226	3812	615.948	561.354	717.387
Col_20d_block2_6_1_X.tif	20d	_X.tif	2618.78	2370.14	1205.39	0.274736	-0.793009	1091224	3649	589.265	530.752	658.003
Col_20d_block2_7_1_X.tif	20d	_X.tif	2475.3	2662.22	1267.84	0.360315	1.50872	1171923	3855	610.855	561.597	667.012
Col_20d_block2_8_1_X.tif	20d	_X.tif	2532.88	2541.14	1020.45	0.364647	-0.493251	754668	3064	490.05	404.174	542.4
Col_20d_block2_9_1_X.tif	20d	_X.tif	2561.81	2577.98	1331.89	0.495946	0.754228	1205975	3829	619.595	569.052	691.521
Col_25d_block1_1_1_X.tif	25d	_X.tif	4093.21	4042.23	2065.67	0.53319	-0.328446	2541820	12042	893.332	467.102	1270.35
Col_25d_block1_10_1_X.tif	25d	_X.tif	3646.15	3560.57	1995.43	0.385093	1.02412	2799810	8289	937.704	662.681	1149.15
Col_25d_block1_12_1_X.tif	25d	_X.tif	4044.96	4160.78	2094.54	0.291684	0.606694	3107140	11493	966.651	586.55	1268.53
Col_25d_block1_13_1_X.tif	25d	_X.tif	4105.74	4292.17	2215.81	0.326159	-0.53487	3450759	12952	1039.15	650.946	1322.68
Col_25d_block1_14_1_X.tif	25d	_X.tif	4135.24	4232.92	2435.52	0.367334	-0.344334	4182827	10445	1161.75	870.936	1446.05
Col_25d_block1_2_1_X.tif	25d	_X.tif	4137.74	4186.54	2600.78	0.362314	0.307157	4761791	13206	1227.2	831.684	1497.52
Col_25d_block1_4_1_X.tif	25d	_X.tif	4099.28	4146.45	2202.03	0.37768	-0.445955	3279250	12099	976.899	391.909	1360.69
Col_25d_block1_6_1_X.tif	25d	_X.tif	3122.2	3185.3	1798.21	0.425923	1.35249	2053171	9974	787.104	353.564	1010.45
Col_25d_block1_7_1_X.tif	25d	_X.tif	3578.55	3779.14	1840.74	0.327396	-1.19718	2372120	8791	860.521	528.037	1102.31
Col_25d_block1_8_1_X.tif	25d	_X.tif	3623.84	3631.48	2294.11	0.589819	0.166426	3120452	11903	1002.79	603.92	1368.16
Col_25d_block2_1_1_X.tif	25d	_X.tif	4084.07	4068.73	2005.23	0.386021	0.62629	2903265	5745	962.533	876.656	1045.99
Col_25d_block2_2_1_X.tif	25d	_X.tif	4233.82	4176.61	2801.73	0.30971	-0.130933	5815397	8260	1362.05	1245.74	1518.04
Col_25d_block2_3_1_X.tif	25d	_X.tif	4095.82	4075.33	2395.88	0.3278	1.56433	4245508	6891	1162.97	1057.31	1246.1
Col_25d_block2_4_1_X.tif	25d	_X.tif	4016.21	3983.35	2446.57	0.458633	0.787171	4171645	6825	1153.17	1055.05	1263.07
Col_25d_block3_1_1_X.tif	25d	_X.tif	3098.77	3746.22	2490.24	0.405858	0.970917	4444401	6951	1190.43	1111.52	1288.32
Col_25d_block3_10_1_X.tif	25d	_X.tif	4116.25	4119.07	2710.93	0.475214	0.560043	5058670	7530	1272.05	1152.45	1429.06
Col_25d_block3_3_1_X.tif	25d	_X.tif	3156.14	3139.89	1678.61	0.231431	0.321273	2139599	5040	824.956	727.954	899.937
Col_25d_block3_5_1_X.tif	25d	_X.tif	3553.08	3632.67	2014.48	0.527328	0.908495	2691414	5574	928.795	825.977	1069.71
Col_25d_block3_6_1_X.tif	25d	_X.tif	3546.11	3563.31	2104.26	0.291501	0.910164	3316824	6078	1027.06	962.799	1106.27
Col_25d_block3_7_1_X.tif	25d	_X.tif	4215.01	4069.54	2876.66	0.358794	-0.467851	6052388	8323	1387.42	1298.22	1505.41
Col_25d_block3_8_1_X.tif	25d	_X.tif	3999.87	4195.21	2314.01	0.520326	0.87974	3582738	6341	1070.5	950.868	1202.38
Col_25d_block3_9_1_X.tif	25d	_X.tif	4041.8	4012.65	2365.35	0.0953492	-0.775533	4362298	7038	1176.76	1104.13	1259.16
Col_30d_block1_1_1_X.tif	30d	_X.tif	5113.93	5193.96	3707.49	0.421421	0.600806	9605649	15603	1753.34	1323.76	2174.51
Col_30d_block1_10_1_X.tif	30d	_X.tif	4968.22	5084.37	3364.12	0.345013	-0.482865	8170716	13076	1604.05	1148.09	1927.05
Col_30d_block1_10_2_X.tif	30d	_X.tif	5029.37	4987.4	3615.65	0.209381	0.24817	9926277	12966	1776.43	1473.16	2000.94
Col_30d_block1_11_1_X.tif	30d	_X.tif	5143.28	5046.36	3577.25	0.297159	0.313884	9583203	10188	1746.07	1628.63	1828.93
Col_30d_block1_12_1_X.tif	30d	_X.tif	5293.69	5171.39	3686.93	0.424771	0.276281	9651736	10520	1752.82	1570.72	1893.17
Col_30d_block1_13_1_X.tif	30d	_X.tif	5124.32	5130.2	4617.78	0.302766	-1.27154	15948539	13248	2251.93	2098.89	2339.95
Col_30d_block1_14_1_X.tif	30d	_X.tif	5042.71	5048.31	4511.41	0.35305	0.806718	14880782	13047	2177.69	1991.56	2379.77
Col_30d_block1_15_1_X.tif	30d	_X.tif	5022.34	5137.81	3690.22	0.305351	0.236831	10170348	10505	1799.95	1713.5	1900.18
Col_30d_block1_2_1_X.tif	30d	_X.tif	5088.98	5042.83	3807.44	0.314542	-0.830994	10719379	13024	1847.4	1591.73	2071.09
Col_30d_block1_3_1_X.tif	30d	_X.tif	5166.77	5014.64	3587.1	0.200378	0.98619	9828170	12354	1770.34	1596.39	2005.53
Col_30d_block1_4_1_X.tif	30d	_X.tif	4987.81	5261.54	3667.71	0.529627	0.252391	8821781	13789	1677.62	1296.43	1999.94
Col_30d_block1_5_1_X.tif	30d	_X.tif	5120.5	5120.5	11824.3	0.00247002	-1.34875	104854659	32768	5707.27	3840.25	8357.11
Col_30d_block1_6_1_X.tif	30d	_X.tif	5120.23	5159.18	3375.62	0.289145	1.49331	8461280	12992	1634.95	1305.64	1942.34
Col_30d_block1_7_1_X.tif	30d	_X.tif	5431.47	4891.87	3574.84	0.358331	0.09844	9223450	12963	1720.73	1420.72	2001.42
Col_30d_block1_8_1_X.tif	30d	_X.tif	5012.3	4914.44	3496.82	0.437333	-1.19957	8444533	14204	1624.76	1203.14	2002.16
Col_30d_block1_9_1_X.tif	30d	_X.tif	5299.67	5034.03	3990.71	0.291006	0.702268	11879587	16359	1949.74	1761.18	2161.53
Col_30d_block3_1_1_X.tif	30d	_X.tif	5003.44	5299.74	4094.53	0.407142	0.562573	11999687	11690	1956.13	1793.78	2122.46
Col_30d_block3_21_1_X.tif	30d	_X.tif	5242.52	5167.66	4123.74	0.415798	1.08885	12107046	11826	1964.28	1817.16	2214.97
Col_30d_block3_7_1_X.tif	30d	_X.tif	4988.28	5082.43	4785.4	0.38125	0.955228	16552854	13803	2294.82	2077.9	2498.68
Col_35d_block1_3_2_X.tif	35d	_X.tif	6079.55	6342.35	4510.83	0.369229	-0.587572	14653505	15357	2153.16	1638.3	2607.05
Col_35d_block1_6_2_X.tif	35d	_X.tif	6316.64	6238.86	4971.17	0.442445	1.16594	17279243	15234	2348.47	1967.77	2623.37
Col_35d_block1_8_1_X.tif	35d	_X.tif	6028.29	6131.48	5260.3	0.417423	0.946086	19661563	15953	2504.73	2289.93	2777.98
Col_35d_block1_9_1_X.tif	35d	_X.tif	6190.26	6024.64	4864.34	0.336599	-1.28979	17369970	15530	2351.02	2035.9	2616.04
Col_35d_block2_1_1_X.tif	35d	_X.tif	5559.74	5783.35	5630.49	0.271811	0.614691	23882058	17072	2757.77	2559.01	3012.48
Col_35d_block2_4_1_X.tif	35d	_X.tif	6119.22	6454.96	5832.79	0.318239	0.643947	25286047	18036	2837.53	2647.55	3019.76
Col_35d_block3_1_4_X.tif	35d	_X.tif	5575.18	5635.61	5675.5	0.378599	1.38543	23362654	15737	2729.23	2528.55	2958.48
Col_35d_block3_2_1_X.tif	35d	_X.tif	6307.1	6229.55	5210.16	0.143572	1.14187	21063680	15207	2589.18	2422.51	2725.94
Col_35d_block3_7_1_X.tif	35d	_X.tif	6145.42	5934.48	5997.07	0.337493	-0.973278	26539963	17171	2907.35	2679.49	3083.35
Col_35d_block4_1_1_X.tif	35d	_X.tif	6347.71	6233.25	5435.02	0.147755	-0.4098	22910339	15682	2702.26	2565.86	2836.55
Col_35d_block4_2_2_X.tif	35d	_X.tif	6302.32	6039.98	5586.5	0.139247	0.370698	24219999	16271	2777.59	2626.02	2929.71
Col_35d_block4_4_1_X.tif	35d	_X.tif	6058.55	5971.27	5519.87	0.327639	-0.849987	22582479	15572	2680.03	2536.82	2842.92
Col_35d_block4_5_2_X.tif	35d	_X.tif	6106.71	6146.45	5944.97	0.408495	1.29093	25305584	17047	2839.22	2651.35	3076.7
Col_35d_block4_6_1_X.tif	35d	_X.tif	6223.45	6320.68	5713.62	0.463982	-0.79664	22688196	15936	2688.32	2446.17	2908.38
Col_35d_block4_9_1_X.tif	35d	_X.tif	6150.78	6236.97	6146.99	0.237256	-0.249196	28765543	18010	3024.5	2854.6	3222.67
