# Supplementary material for: Automated quantitative histology reveals vascular morphodynamics during Arabidopsis hypocotyl secondary growth
Source: eLife. 2014 Feb 11;3:e01567. doi: 10.7554/eLife.01567 (PMC3917233; doi:10.7554/eLife.01567)
Supplement: Supplementary file 3. — Quality control files for the Ler sections. DOI: http://dx.doi.org/10.7554/eLife.01567.014 [file elife01567s003.xlsx]

## Sheet: Sankar_2013_Tab_S8.txt
_A.tif is whole section area, _X.tif is xylem area
fn	age	patterns	m.cx	m.cy	m.majoraxis	m.eccentricity	m.theta	s.area	s.perimeter	s.radius.mean	s.radius.min	s.radius.max
ler15d_block1_1_1_A.tif	15d	_A.tif	1535.49	1483.71	1239.39	0.746276	-0.311613	801456	3062	507.861	384.151	640.064
ler15d_block1_10_1_A.tif	15d	_A.tif	1623.81	1437.49	840.017	0.653058	1.13807	414766	2315	364.655	263.062	425.778
ler15d_block1_11_1_A.tif	15d	_A.tif	1589.89	1502.84	968.036	0.620157	-1.27416	574145	2679	428.492	340.85	506.772
ler15d_block1_2_1_A.tif	15d	_A.tif	1554.3	1701.29	876.672	0.608571	-0.00352371	474328	2379	387.751	300.495	453.368
ler15d_block1_3_1_A.tif	15d	_A.tif	1499.03	1502.53	939.898	0.687014	-0.203029	499295	2454	398.975	295.625	469.481
ler15d_block1_4_1_A.tif	15d	_A.tif	1432.29	1606.02	832.26	0.673603	0.700884	398954	2202	359.304	286.355	419.683
ler15d_block1_6_1_A.tif	15d	_A.tif	1528.44	1508.11	1025.59	0.669456	-0.706127	610529	2704	444.141	353.092	542.63
ler15d_block1_9_1_A.tif	15d	_A.tif	1486.72	1551.39	910.734	0.641825	0.243415	497710	2386	398.171	326.654	463.892
ler15d_block2_1_A.tif	15d	_A.tif	997.048	1037.71	847.804	0.445953	-0.156508	504344	2410	400.131	359.848	431.987
ler15d_block2_2_A.tif	15d	_A.tif	968.478	1104.84	817.24	0.634739	0.507445	403058	2155	360.138	318.141	432.009
ler15d_block2_3_A.tif	15d	_A.tif	1022.06	1059.03	827.35	0.611386	-0.320953	424705	2233	367.841	307.783	419.706
ler15d_block2_4_A.tif	15d	_A.tif	1076.67	1087.45	825.243	0.562684	-0.277085	439816	2287	373.332	296.263	412.894
ler15d_block2_5_A.tif	15d	_A.tif	1033.99	1031.08	812.3	0.657609	0.0337441	388418	2153	352.314	279.939	407.701
ler15d_block2_6_A.tif	15d	_A.tif	1044.69	1031.63	839.7	0.50361	1.11601	477618	2324	389.881	348.131	431.677
ler15d_block2_7_A.tif	15d	_A.tif	985.123	1008.26	735.255	0.553658	1.31598	352551	2001	334.973	298.167	398.519
ler15d_block2_8_A.tif	15d	_A.tif	1057.4	1052.35	773.123	0.594478	1.33404	375977	2095	346.651	281.098	391.961
ler15d_block2_9_A.tif	15d	_A.tif	994.687	1058.5	815.911	0.713645	0.0274863	364968	2110	342.12	260.576	414.15
ler20d_block1_10_1_A.tif	20d	_A.tif	2176.75	2199.58	2840.61	0.541764	-1.4483	5314086	7580	1303.19	1173.96	1488.91
ler20d_block1_11_1_A.tif	20d	_A.tif	2032.38	1947.53	1889.44	0.46769	-1.02557	2469018	5258	886.942	816.282	986.361
ler20d_block1_2_1_A.tif	20d	_A.tif	2060.21	2071.65	2113.13	0.377657	1.49752	3242384	6100	1015.43	915.962	1083.11
ler20d_block1_3_1_A.tif	20d	_A.tif	1951.12	2012.65	1693.19	0.631863	0.600993	1743009	4433	748.646	640.136	862.299
ler20d_block1_4_1_A.tif	20d	_A.tif	2149.81	1907.76	1707.76	0.547626	0.801459	1915671	4690	783.49	702.914	881.754
ler20d_block1_5_1_A.tif	20d	_A.tif	2043.08	2027.66	1426.97	0.357827	-0.746163	1491929	4084	688.555	629.014	736.575
ler20d_block1_8_1_A.tif	20d	_A.tif	2093.96	1948.6	2113.15	0.490031	1.2691	3049744	5824	986.775	894.574	1095.83
ler20d_block1_9_1_A.tif	20d	_A.tif	2037.52	2244.11	2626.94	0.499398	-0.00200067	4674055	7300	1220.22	1058.03	1371.41
ler20d_block2_1_A.tif	20d	_A.tif	1454.23	1605.88	2125.93	0.557518	-0.0546745	2937223	5845	967.29	833.603	1087.85
ler20d_block2_2_A.tif	20d	_A.tif	1476.23	1603.41	2904.38	0.538996	0.335726	5569291	7903	1331.52	1176.41	1481.47
ler20d_block2_3_A.tif	20d	_A.tif	1566.46	1595.42	2313.94	0.605343	-1.01284	3339209	6120	1034.7	858.525	1180.99
ler20d_block2_4_A.tif	20d	_A.tif	1652.64	1547.32	2703.77	0.519432	-0.834014	4900816	7305	1251.66	1132.63	1384.6
ler20d_block2_5_A.tif	20d	_A.tif	1596.25	1571.88	2159.25	0.53589	-0.263245	3086552	5806	991.338	874.176	1099
ler20d_block2_6_A.tif	20d	_A.tif	1622.86	1554.43	1728.98	0.608263	0.944837	1851341	4562	770.155	577.977	888.136
ler20d_block2_7_A.tif	20d	_A.tif	1590.97	1602.56	1971.56	0.47525	-0.123276	2677507	5474	922.231	812.226	998.457
ler20d_block2_8_A.tif	20d	_A.tif	1494.87	1582.32	2107.79	0.527596	-0.976243	2954404	5802	971.423	882.057	1108.25
ler25d_block1_1_1_A.tif	25d	_A.tif	3041.02	3171.36	4464.03	0.512716	-0.3354	13403087	12171	2069.09	1833.2	2341.68
ler25d_block1_10_1_A.tif	25d	_A.tif	2905.46	3207.34	4787.17	0.547278	-1.47022	15050953	12950	2192.89	1960.55	2445.11
ler25d_block1_11_1_A.tif	25d	_A.tif	3257.82	2958.01	5091	0.306424	-0.712185	19367001	14642	2480.86	2306.4	2576.02
ler25d_block1_12_1_A.tif	25d	_A.tif	3008.91	3105.45	4686.89	0.484921	0.799365	15078724	12818	2195.44	1996.19	2369.37
ler25d_block1_13_1_A.tif	25d	_A.tif	3216.4	2973.14	5071.36	0.344081	-0.161214	18949925	14362	2455.95	2333.89	2592.96
ler25d_block1_14_1_A.tif	25d	_A.tif	2984	3237.49	4902.88	0.459611	0.130536	16747483	13439	2310.25	2123.51	2502.96
ler25d_block1_15_1_A.tif	25d	_A.tif	3193.35	3089.36	4705.85	0.396341	1.25936	15947115	13248	2253.4	2057.3	2415.49
ler25d_block1_16_1_A.tif	25d	_A.tif	3057.5	3044.55	4318.46	0.367853	1.20598	13605395	12232	2082.16	1949.33	2214.42
ler25d_block1_17_1_A.tif	25d	_A.tif	3077.1	3244.72	4923.08	0.378085	0.600737	17613808	13958	2368.29	2239.76	2514.74
ler25d_block1_2_1_A.tif	25d	_A.tif	3041.64	3129.69	5614.8	0.497991	0.25709	21415297	15450	2613.29	2372.65	2988.8
ler25d_block1_3_1_A.tif	25d	_A.tif	2763.37	3251.2	5066.08	0.464991	0.0432813	17822151	13916	2381.56	2164.65	2665.39
ler25d_block1_4_1_A.tif	25d	_A.tif	3219.83	3194.43	5140.25	0.61185	0.296932	16394216	13802	2292.64	1998.59	2695.81
ler25d_block1_5_1_A.tif	25d	_A.tif	3133.94	3095.96	4106.28	0.292922	-0.288291	12654565	11779	2005.97	1884.53	2139.5
ler25d_block1_6_1_A.tif	25d	_A.tif	2845.08	3128.85	3624.21	0.365147	0.756914	9596251	10253	1749.21	1639.31	1839.81
ler25d_block1_7_1_A.tif	25d	_A.tif	3066.9	3173.67	5156	0.382546	0.0332891	19283591	14460	2477.64	2347.08	2619.51
ler25d_block1_8_1_A.tif	25d	_A.tif	3097.81	3222.95	4121.74	0.417725	-1.17909	12114137	11435	1964.27	1776.65	2116.73
ler25d_block1_9_1_A.tif	25d	_A.tif	2844.04	3110.14	4379.81	0.281575	1.43602	14440036	12632	2142.48	2007.06	2254.51
ler25d_block2_1_1_A.tif	25d	_A.tif	4033.21	4233.61	4501.69	0.395591	1.45088	14596141	12315	2158.36	2047.15	2349.05
ler25d_block2_10_1_A.tif	25d	_A.tif	3154.08	3280.14	4644.96	0.444361	-0.381427	15159028	12980	2195.24	1986.95	2382.41
ler25d_block2_11_1_A.tif	25d	_A.tif	3014.33	3076.87	4433.73	0.452779	0.381217	13757647	12137	2094.11	1962.01	2292.47
ler25d_block2_12_1_A.tif	25d	_A.tif	3168.61	3209.88	3211.61	0.46419	1.16949	7156005	8908	1512.07	1372.04	1678.77
ler25d_block2_13_1_A.tif	25d	_A.tif	2890.96	3127.03	3818	0.416864	0.376715	10382989	10668	1819.08	1658.52	1985.6
ler25d_block2_14_1_A.tif	25d	_A.tif	3201.92	3269.08	4764.79	0.366562	1.04893	16571868	13359	2297.49	2158.52	2443.64
ler25d_block2_15_1_A.tif	25d	_A.tif	3068.05	3081.81	3795.16	0.348772	0.944296	10591453	10761	1837	1737.83	1965.39
ler25d_block2_16_1_A.tif	25d	_A.tif	3204.88	3172.44	4737.63	0.294053	-0.353837	16823511	13354	2314.63	2208.86	2447.48
ler25d_block2_17_1_A.tif	25d	_A.tif	2970.97	2876.48	4389.5	0.437092	1.09486	13599680	12085	2082	1916.39	2209.38
ler25d_block2_2_1_A.tif	25d	_A.tif	3398.11	3150.73	4488.28	0.369161	-0.635782	14693197	12725	2161.93	2053.55	2289.92
ler25d_block2_3_1_A.tif	25d	_A.tif	2971.32	3387.19	4172.92	0.558534	1.51715	11324489	11148	1901.7	1662.26	2119.24
ler25d_block2_4_1_A.tif	25d	_A.tif	3128.52	3476.76	3809.7	0.433988	-1.28045	10249347	10634	1808.11	1630.03	1980.88
ler25d_block2_5_1_A.tif	25d	_A.tif	3117.04	2983.14	4653.51	0.367473	0.728119	15806594	13182	2243.18	2093.53	2363.87
ler25d_block2_6_1_A.tif	25d	_A.tif	2958.54	3186.75	3815.82	0.474816	0.982892	10055506	10417	1793.07	1645.24	1940.38
ler25d_block2_7_1_A.tif	25d	_A.tif	3450.34	3031.2	4498.92	0.331614	0.338202	14971021	13007	2181.95	2055.84	2299.6
ler25d_block2_8_1_A.tif	25d	_A.tif	2883.75	3161.54	4105.24	0.457793	-0.681282	11752242	11376	1936.18	1800.64	2114.54
ler25d_block2_9_1_A.tif	25d	_A.tif	2982.55	3034.2	3981.3	0.376826	-0.0782433	11504833	11149	1912.8	1758.92	2096
ler30d_block1_1_1_A.tif	30d	_A.tif	4874.67	4424.32	6785.77	0.319927	-0.624547	34185172	19182	3302.07	3051.82	3502.13
ler30d_block1_2_1_A.tif	30d	_A.tif	4802.65	4723.1	6558.35	0.21627	-1.34868	32926176	18743	3240	3110.58	3442.04
ler30d_block1_3_1_A.tif	30d	_A.tif	4615.72	4573.88	6806.7	0.408371	-0.623248	33200896	19289	3251.82	3082.37	3473.39
ler30d_block1_4_1_A.tif	30d	_A.tif	4938.73	5232.35	6526.53	0.356745	0.345386	31220443	18577	3153.11	3011.46	3372.49
ler30d_block1_5_1_A.tif	30d	_A.tif	4613.15	4742.67	6018.68	0.270587	-0.531928	27337838	17538	2947.35	2754.09	3140.1
ler30d_block1_6_1_A.tif	30d	_A.tif	4755.11	4659.67	6796.49	0.26571	-0.830131	34957933	19802	3334.52	3153.93	3497.93
ler30d_block1_7_1_A.tif	30d	_A.tif	4407.48	4682.18	6754.9	0.35631	0.954432	33464169	19450	3264.71	3086.48	3436.65
ler30d_block1_8_1_A.tif	30d	_A.tif	4752.62	4917.56	5671.52	0.217228	0.620851	24650192	16410	2800.32	2711.35	2911.03
ler30d_block1_9_1_A.tif	30d	_A.tif	4838.6	4550.61	6663.5	0.391024	0.387058	32069798	18909	3196.15	3005.3	3473.87
ler30d_block2_1_1_A.tif	30d	_A.tif	6253.22	6528.9	6461.12	0.262079	-1.35065	31613933	18822	3171.84	3024.15	3336.89
ler30d_block2_10_1_A.tif	30d	_A.tif	4261.99	4384.79	5557.81	0.203495	1.21207	23728972	16106	2748	2621.41	2892.61
ler30d_block2_11_1_A.tif	30d	_A.tif	4200.66	4206.57	6405.4	0.293094	1.17972	30787015	18050	3133.49	2993.02	3274.19
ler30d_block2_12_1_A.tif	30d	_A.tif	4046.83	4126.04	5764.11	0.37321	1.47219	24202531	16267	2777.19	2626.14	2924.32
ler30d_block2_2_1_A.tif	30d	_A.tif	4046.58	4040.45	5965.12	0.33476	0.823494	26315500	17281	2895.47	2774.47	3117.29
ler30d_block2_3_1_A.tif	30d	_A.tif	3769.39	4241.27	6166.75	0.309942	0.382619	28374839	17623	3005.7	2862.61	3149.88
ler30d_block2_4_1_A.tif	30d	_A.tif	3971.31	4208.52	6201.25	0.343381	-0.320959	28354930	17617	3004.49	2862.66	3182.04
ler30d_block2_5_1_A.tif	30d	_A.tif	4274.48	3900.17	6433.03	0.30002	1.3635	30988809	18627	3140.77	2992.49	3290.11
ler30d_block2_6_1_A.tif	30d	_A.tif	4169.85	3943.17	6188.84	0.30799	0.615238	28596129	17792	3016.42	2880.15	3197.78
ler30d_block2_7_1_A.tif	30d	_A.tif	3909.42	4069.54	5750.78	0.304208	1.4265	24725909	16486	2806.09	2682.42	2931.74
ler30d_block2_8_1_A.tif	30d	_A.tif	3941.42	4114.78	5743.65	0.129317	0.331362	25667178	16916	2856.86	2733.66	2971.67
ler30d_block2_9_1_A.tif	30d	_A.tif	3980.83	4326.7	6665.84	0.34692	-1.53449	32709306	18672	3227.04	3064.54	3398.56
ler35d_block1_1_1_A.tif	35d	_A.tif	5999.75	6659.84	7939.53	0.499112	-0.474012	42845590	21722	3694.46	3314.52	3964.44
ler35d_block1_10_1_A.tif	35d	_A.tif	5883.33	6492.8	7550.47	0.244883	0.59459	43377090	21589	3716.9	3578.6	3907.48
ler35d_block1_11_1_A.tif	35d	_A.tif	6073.29	6311.53	7537.42	0.411284	0.149522	40649046	21046	3595.81	3357.26	3822.79
ler35d_block1_12_1_A.tif	35d	_A.tif	6027.5	6545.44	6780.11	0.31936	-0.495687	34188291	19230	3298.68	3118.94	3494.99
ler35d_block1_2_1_A.tif	35d	_A.tif	5879.99	6538.02	9562.19	0.644745	-1.35358	54858618	24976	4195.04	3529.13	4822.48
ler35d_block1_3_1_A.tif	35d	_A.tif	6094.2	6658.76	7397.99	0.253835	-0.166194	41542506	21776	3633.51	3465.93	3763.24
ler35d_block1_4_1_A.tif	35d	_A.tif	6267.46	6146.48	8243.3	0.319919	0.0990647	50527574	23508	4012.21	3864.87	4289.35
ler35d_block1_5_1_A.tif	35d	_A.tif	6090.16	6060.47	7694.85	0.382406	1.33692	42916917	21569	3698.23	3425.12	3903.5
ler35d_block1_6_1_A.tif	35d	_A.tif	5777.65	6250.84	7494.47	0.360289	0.86937	41062218	21132	3621.16	3339.8	3967.34
ler35d_block1_8_1_A.tif	35d	_A.tif	6168.49	6314.49	8200.94	0.438152	1.54448	47430933	22820	3890.88	3656.28	4263.7
ler35d_block1_9_1_A.tif	35d	_A.tif	6115.17	6233.39	8122.37	0.340401	-1.23357	48695813	23044	3936.21	3729.71	4121.66
ler35d_block2_1_1_A.tif	35d	_A.tif	6342.12	6080.65	6610.37	0.343605	0.284484	32183454	18553	3203.34	3049.53	3405.74
ler35d_block2_10_1_A.tif	35d	_A.tif	4828.82	4946.64	6676.49	0.381551	-0.952803	32346580	18785	3209.2	3000.95	3398.29
ler35d_block2_11_1_A.tif	35d	_A.tif	4846.74	5115.99	6566.74	0.300054	-0.231402	32255870	18729	3203.4	3000.96	3469.99
ler35d_block2_12_1_A.tif	35d	_A.tif	5654.52	5551.57	7107	0.375716	-0.702755	36696696	19914	3419.17	3072.54	3624.44
ler35d_block2_2_1_A.tif	35d	_A.tif	4912.53	4982.32	7533.42	0.413042	0.689495	40571400	21183	3598.53	3345.27	3860.12
ler35d_block2_3_1_A.tif	35d	_A.tif	5488.83	5124.24	7013.55	0.301378	-0.092434	36803653	19863	3424.13	3224.55	3634.31
ler35d_block2_4_1_A.tif	35d	_A.tif	5011.04	4944.46	6582.97	0.211719	-0.829418	33245523	18764	3254.49	3150.5	3393.34
ler35d_block2_5_1_A.tif	35d	_A.tif	5120.77	5193.13	6858.35	0.2185	0.556262	36017197	20038	3383.87	3276.02	3533.87
ler35d_block2_6_1_A.tif	35d	_A.tif	5226.61	5258.74	8021.21	0.395775	0.382619	46345711	22501	3843.7	3564.87	4116.29
ler35d_block2_7_1_A.tif	35d	_A.tif	5148.25	5305.24	6820.02	0.30752	0.382707	34739357	19672	3323.61	3147.87	3493.11
ler35d_block2_8_1_A.tif	35d	_A.tif	5244.85	5123.43	7511.95	0.305625	-1.37359	42168669	21577	3662.37	3495.3	3851.41
ler35d_block2_9_1_A.tif	35d	_A.tif	4865.45	5197.87	7165.46	0.391977	0.629629	37033857	20337	3436.78	3237.02	3764.69
ler35d_block3_1_1_A.tif	35d	_A.tif	6202.87	4789.15	10467.7	0.660477	1.25574	64429126	27610	4560.93	3709.65	5461.4
ler35d_block3_10_1_A.tif	35d	_A.tif	4681.71	4712.74	8826.37	0.473299	1.05175	53810275	24149	4148.52	3683.69	4476.02
ler35d_block3_11_1_A.tif	35d	_A.tif	5138.16	5385.37	7380.33	0.332114	1.09464	40333701	20677	3585.19	3413.17	3756.14
ler35d_block3_2_1_A.tif	35d	_A.tif	6190.23	6422.63	7710.68	0.251413	-1.25893	45140271	21913	3790.79	3579.89	3999.85
ler35d_block3_3_1_A.tif	35d	_A.tif	6302.65	6040.49	7175.27	0.393025	0.323547	37133446	19752	3442.76	3252.23	3712.73
ler35d_block3_4_1_A.tif	35d	_A.tif	6118.86	5703.1	8626.8	0.49444	-1.15374	50778273	23539	4024.24	3639.15	4391.93
ler35d_block3_5_1_A.tif	35d	_A.tif	6416.52	5904.8	7228.87	0.422773	0.778581	37160511	20366	3442.82	3227.39	3778.76
ler35d_block3_6_1_A.tif	35d	_A.tif	6449.79	6308.16	7968.99	0.698421	-0.0140999	35672377	20013	3379.7	2801.69	4024.34
ler35d_block3_7_1_A.tif	35d	_A.tif	6143.42	6024.79	6832.79	0.363653	-0.89501	34145183	19184	3297.85	3136.9	3537.63
ler35d_block3_8_1_A.tif	35d	_A.tif	6192.66	6184.86	7938.75	0.31265	0.853938	46981357	22393	3868.59	3678.39	4067.42
ler35d_block3_9_1_A.tif	35d	_A.tif	6552.58	6551.58	8946.87	0.562071	0.625592	51923967	23446	4083.13	3500.58	4522.37
ler15d_block1_1_1_X.tif	15d	_X.tif	1540.23	1467.53	499.091	0.549827	-0.0372686	158674	1560	225.485	166.543	274.363
ler15d_block1_10_1_X.tif	15d	_X.tif	1638.43	1429.05	451.294	0.393344	-1.2015	142779	1593	213.955	175.03	259.721
ler15d_block1_11_1_X.tif	15d	_X.tif	1604.75	1504.43	478.935	0.441898	-0.014023	155304	1615	222.697	159.816	283.793
ler15d_block1_2_1_X.tif	15d	_X.tif	1557.75	1704.62	476.657	0.372964	-0.988732	160063	1598	225.588	175.377	268.005
ler15d_block1_3_1_X.tif	15d	_X.tif	1483.91	1496.36	507.095	0.416832	0.218637	176721	1761	239.586	189.772	313.522
ler15d_block1_4_1_X.tif	15d	_X.tif	1432.41	1596.56	424.457	0.373607	-0.441643	125920	1558	200.365	155.019	247.135
ler15d_block1_6_1_X.tif	15d	_X.tif	1552.25	1535.8	474.171	0.384605	0.605442	154900	1599	223.383	153.224	273.089
ler15d_block1_7_1_X.tif	15d	_X.tif	1536.01	1536.75	3553.96	0.0510132	-0.572918	9364485	12664	1763.22	1490.34	2225.2
ler15d_block1_9_1_X.tif	15d	_X.tif	1481.68	1517.26	515.695	0.610326	0.527006	158930	1738	226.353	146.841	306.961
ler15d_block2_1_X.tif	15d	_X.tif	976.305	1028.44	444.094	0.409031	-0.44013	136488	1505	208.306	144.233	246.378
ler15d_block2_2_X.tif	15d	_X.tif	976.869	1104.28	417.013	0.583579	1.11554	108819	1265	185.961	146.84	228.967
ler15d_block2_3_X.tif	15d	_X.tif	1011.99	1057.49	440.371	0.514562	-0.259692	127195	1407	201.422	162.394	246.431
ler15d_block2_4_X.tif	15d	_X.tif	1073.51	1101.29	455.624	0.551134	0.282565	133015	1369	205.596	151.857	246.607
ler15d_block2_5_X.tif	15d	_X.tif	1055.34	1049.21	427.264	0.477607	0.886372	121113	1387	197.581	158.387	247.494
ler15d_block2_6_X.tif	15d	_X.tif	1038.07	1045.01	460.227	0.405665	1.55761	148847	1439	216.827	171.223	246.479
ler15d_block2_7_X.tif	15d	_X.tif	1000.75	1010.48	374.171	0.343888	-1.54753	99295	1199	178.395	137.338	216.785
ler15d_block2_8_X.tif	15d	_X.tif	1067.02	1064.4	473.89	0.569772	0.398365	131738	1743	207.243	140.052	273.451
ler15d_block2_9_X.tif	15d	_X.tif	988.034	1064.95	424.417	0.538314	0.19185	117562	1291	192.691	144.722	231.829
ler20d_block1_10_1_X.tif	20d	_X.tif	2131.68	2328.05	1145.31	0.302753	1.46545	978255	3740	558.176	492.636	602.082
ler20d_block1_11_1_X.tif	20d	_X.tif	2037.28	1958.22	871.813	0.300163	-0.551419	558282	2943	422.054	350.685	491.442
ler20d_block1_2_1_X.tif	20d	_X.tif	2050.58	2077.99	874.193	0.40632	1.29338	541110	2946	415.482	362.659	471.024
ler20d_block1_3_1_X.tif	20d	_X.tif	1981.06	2012.81	658.205	0.239526	0.383933	318549	2210	319.346	264.139	395.662
ler20d_block1_4_1_X.tif	20d	_X.tif	2093.07	1922.27	716.659	0.358248	-0.365172	371334	2350	343.421	273.024	393.51
ler20d_block1_5_1_X.tif	20d	_X.tif	2046.68	2068.61	707.1	0.446136	1.55189	349675	2194	333.511	289.187	363.587
ler20d_block1_8_1_X.tif	20d	_X.tif	2077.55	2006.34	882.384	0.476402	1.21496	532363	2663	411.335	353.068	460.885
ler20d_block1_9_1_X.tif	20d	_X.tif	2167.5	2244.43	1141.5	0.58323	0.456232	823551	3357	514.416	430.464	614.177
ler20d_block2_1_X.tif	20d	_X.tif	1527.03	1579.26	899.318	0.269399	0.319651	598475	2926	436.358	339.876	519.819
ler20d_block2_2_X.tif	20d	_X.tif	1518.3	1590.18	1254.16	0.44319	0.464523	1098847	3677	591.828	528.611	678.909
ler20d_block2_3_X.tif	20d	_X.tif	1574.37	1570.17	1019.65	0.495787	-1.0538	705045	3030	474.347	413.65	545.602
ler20d_block2_4_X.tif	20d	_X.tif	1595.5	1605.08	1209.49	0.478798	-0.891736	1000039	3638	562.536	462.479	631.14
ler20d_block2_5_X.tif	20d	_X.tif	1580.53	1522.38	887.919	0.33571	-0.192606	578745	2709	429.035	390.613	485.304
ler20d_block2_6_X.tif	20d	_X.tif	1632.3	1615.54	812.317	0.321466	0.348402	485529	2453	393.4	343.543	434.568
ler20d_block2_7_X.tif	20d	_X.tif	1543.43	1578.94	900.786	0.539636	-0.200243	531660	2540	411.377	347.325	485.819
ler20d_block2_8_X.tif	20d	_X.tif	1498.47	1594.62	924.912	0.351463	-0.827564	623957	2792	445.545	397.749	497.21
ler25d_block1_1_1_X.tif	25d	_X.tif	3066.76	3152.56	2395.42	0.235388	-0.341177	4354228	7711	1178.81	1070.45	1297.02
ler25d_block1_10_1_X.tif	25d	_X.tif	2992.91	3219.96	2235.11	0.48748	-1.30291	3397553	7145	1040.09	913.139	1205.34
ler25d_block1_11_1_X.tif	25d	_X.tif	3224.51	3019.14	2715.58	0.464176	-0.683663	5106155	8007	1277.56	1131.6	1449.9
ler25d_block1_12_1_X.tif	25d	_X.tif	3036.06	3094.58	2352.11	0.563488	0.871627	3564014	7267	1067.57	895.294	1257.12
ler25d_block1_13_1_X.tif	25d	_X.tif	3198.57	3053.69	2434.76	0.430063	-0.902925	4167538	7483	1152.87	1007.1	1359.72
ler25d_block1_14_1_X.tif	25d	_X.tif	3112.49	3215.24	2107.65	0.496652	0.602643	3002580	6600	980.481	801.584	1111.89
ler25d_block1_15_1_X.tif	25d	_X.tif	3145.09	3140.27	2286.44	0.569036	1.16004	3331546	6531	1034.75	828.975	1242.86
ler25d_block1_16_1_X.tif	25d	_X.tif	3073.53	3073.03	2405.62	0.578846	1.02313	3691519	6886	1089.21	939.065	1295.51
ler25d_block1_17_1_X.tif	25d	_X.tif	3125.68	3154.07	2442.15	0.542821	0.699207	3903617	7680	1115.78	932.52	1286.78
ler25d_block1_2_1_X.tif	25d	_X.tif	3090.21	3165.92	2792.53	0.533426	0.464605	5149284	8706	1283.75	1111.71	1486.6
ler25d_block1_3_1_X.tif	25d	_X.tif	3017.52	3199.38	2109.77	0.423274	-0.126535	3154864	6682	1001.43	864.202	1102.13
ler25d_block1_4_1_X.tif	25d	_X.tif	3143.38	3106.68	2309.95	0.550239	0.313673	3438767	7565	1053.26	886.389	1278.12
ler25d_block1_5_1_X.tif	25d	_X.tif	3144.41	3157.69	2201.86	0.484065	-0.269173	3285849	7325	1025.67	860.991	1210.75
ler25d_block1_6_1_X.tif	25d	_X.tif	3031.07	3110.03	1867.76	0.621519	0.784729	2112590	5763	827.301	699.735	1020.08
ler25d_block1_7_1_X.tif	25d	_X.tif	3098.38	3117.26	2452.21	0.408841	0.429843	4287736	7458	1169.09	1044.13	1308.5
ler25d_block1_8_1_X.tif	25d	_X.tif	3148.8	3208.39	2058.84	0.476774	-1.22637	2915611	6353	964.477	834.129	1071.59
ler25d_block1_9_1_X.tif	25d	_X.tif	2873.29	3278.46	2107.62	0.419594	-1.00819	3152639	6340	1003.41	908.756	1125.15
ler25d_block2_1_1_X.tif	25d	_X.tif	3974.66	4218.77	1957.86	0.4159	1.29714	2724021	5695	932.349	849.41	1066.79
ler25d_block2_10_1_X.tif	25d	_X.tif	3075.64	3176.36	2045.84	0.363759	-0.503515	3048655	6170	986.116	911.107	1093.56
ler25d_block2_11_1_X.tif	25d	_X.tif	3117.81	3097.39	2019.57	0.476227	0.677707	2792316	6411	942.949	808.937	1116.61
ler25d_block2_12_1_X.tif	25d	_X.tif	3110.79	3122.37	1471.35	0.395451	1.16233	1550383	4494	705.076	639.196	796.548
ler25d_block2_13_1_X.tif	25d	_X.tif	3009.3	3151.73	1836.04	0.586602	0.092709	2127350	5396	824.909	671.68	983.137
ler25d_block2_14_1_X.tif	25d	_X.tif	3174.33	3128.02	2230.32	0.246129	0.438488	3738612	7618	1091.52	953.905	1225.12
ler25d_block2_15_1_X.tif	25d	_X.tif	3177.79	3102.1	1681.11	0.371268	1.31013	2018917	5408	802.455	616.842	947.199
ler25d_block2_16_1_X.tif	25d	_X.tif	3216.85	3220.18	2174.63	0.479719	0.159173	3232109	6781	1016.61	893.671	1143.72
ler25d_block2_17_1_X.tif	25d	_X.tif	3086.58	3085.28	2109.57	0.601067	1.12119	2755228	6107	940.931	743.387	1129.95
ler25d_block2_2_1_X.tif	25d	_X.tif	3270.52	3106.83	1972	0.397374	-1.56568	2776927	5968	940.67	806.903	1037.28
ler25d_block2_3_1_X.tif	25d	_X.tif	2916.35	3253.19	1817.28	0.612263	1.41606	2044481	5043	808.46	658.811	928.919
ler25d_block2_4_1_X.tif	25d	_X.tif	3090.48	3360.14	1745.1	0.44408	-1.45168	2137157	5056	825.028	745.138	901.753
ler25d_block2_5_1_X.tif	25d	_X.tif	3097.78	3069.05	2130.87	0.359094	0.564208	3313083	6646	1029.56	951.5	1150.43
ler25d_block2_6_1_X.tif	25d	_X.tif	3047.54	3145	1878.14	0.481847	1.04075	2414149	5439	877.585	772.459	1006.07
ler25d_block2_7_1_X.tif	25d	_X.tif	3305.58	3045	2141.15	0.553801	0.81433	2967788	6571	977.459	826.769	1124.96
ler25d_block2_8_1_X.tif	25d	_X.tif	3038.6	3145.3	1917.68	0.433452	-1.00945	2546133	5869	906.66	701.045	1123.86
ler25d_block2_9_1_X.tif	25d	_X.tif	3114.77	3073.75	1961.46	0.479438	0.0598818	2624894	5959	915.338	769.11	1042.56
ler30d_block1_1_1_X.tif	30d	_X.tif	4742.65	4488.12	3932.57	0.464417	0.342863	10717038	11284	1848.95	1609.76	2011.14
ler30d_block1_2_1_X.tif	30d	_X.tif	4654.85	4626.89	4066.98	0.419296	1.54547	11764511	11711	1935.33	1757.39	2103.25
ler30d_block1_3_1_X.tif	30d	_X.tif	4619.74	4628.83	4195.09	0.139922	-1.09018	13668610	12583	2085.62	1980.36	2172.68
ler30d_block1_4_1_X.tif	30d	_X.tif	4754.19	5069.19	3843.76	0.396655	0.847045	10634398	11664	1841.11	1693.9	2020.85
ler30d_block1_5_1_X.tif	30d	_X.tif	4645.47	4721	3517.26	0.294339	-1.56072	9267725	10373	1716.58	1571.53	1833.63
ler30d_block1_6_1_X.tif	30d	_X.tif	4814.13	4630.4	4039.8	0.173921	-1.15172	12571487	12456	1999.16	1869.01	2214.99
ler30d_block1_7_1_X.tif	30d	_X.tif	4449.75	4692.67	4252.15	0.383037	0.520825	13095311	12638	2043.55	1875.77	2213.88
ler30d_block1_8_1_X.tif	30d	_X.tif	4715.95	4770.52	3575.13	0.356842	0.47731	9356680	10674	1727.05	1577.86	1865.94
ler30d_block1_9_1_X.tif	30d	_X.tif	4808.35	4631.87	3928.9	0.418465	0.239615	10980190	11312	1871	1598.5	2034.8
ler30d_block2_1_1_X.tif	30d	_X.tif	6165.43	6393.26	3658.14	0.308498	-1.27048	9977192	10680	1781.61	1627.31	1893
ler30d_block2_10_1_X.tif	30d	_X.tif	4230.79	4347.31	3346.88	0.3658	0.741358	8181377	9690	1614.44	1506.14	1710.52
ler30d_block2_11_1_X.tif	30d	_X.tif	4201.86	4260.5	3639.69	0.346569	0.196348	9750576	10335	1761.43	1662.9	1858.47
ler30d_block2_12_1_X.tif	30d	_X.tif	4084.88	4075.96	3418.42	0.301438	1.00525	8731939	9937	1666.92	1540.77	1768.3
ler30d_block2_2_1_X.tif	30d	_X.tif	4095.83	4004.52	3531.53	0.431433	0.62752	8821531	9785	1678.13	1518.81	1810.42
ler30d_block2_3_1_X.tif	30d	_X.tif	3958.31	4219.94	3328.56	0.336234	0.448542	8167800	9724	1612.59	1472.86	1740.71
ler30d_block2_4_1_X.tif	30d	_X.tif	4020	4180.5	3740.15	0.263242	0.270232	10547247	11452	1832.55	1664.97	1995.07
ler30d_block2_5_1_X.tif	30d	_X.tif	4184.39	3940.9	4023.91	0.438023	1.01597	11403875	11334	1908.99	1746.21	2107.09
ler30d_block2_6_1_X.tif	30d	_X.tif	4086.04	4052.01	3510.47	0.392105	0.567966	8889409	9978	1683.26	1558.85	1789.65
ler30d_block2_7_1_X.tif	30d	_X.tif	3837.86	4050.45	3286.1	0.355463	0.99576	7912865	9357	1588.69	1483.34	1725.32
ler30d_block2_8_1_X.tif	30d	_X.tif	4075.13	4145.73	3474.76	0.206853	1.23726	9267723	10207	1717.24	1620.26	1785.88
ler30d_block2_9_1_X.tif	30d	_X.tif	4072.03	4265	4055.21	0.39854	1.56709	11829295	11709	1940.33	1804.5	2069.97
ler35d_block1_1_1_X.tif	35d	_X.tif	6080.71	6492.53	5846.84	0.531036	-0.574607	22723217	15924	2692.55	2374.04	2953.33
ler35d_block1_10_1_X.tif	35d	_X.tif	5970.84	6426.65	5206.94	0.359437	0.196905	19824137	14753	2513.66	2313.54	2723.19
ler35d_block1_11_1_X.tif	35d	_X.tif	6087.51	6372.86	5129.04	0.405628	0.197703	18846028	14360	2452.46	2262.58	2647.4
ler35d_block1_12_1_X.tif	35d	_X.tif	6151.41	6438.35	4598.11	0.344328	-1.0619	15579479	12826	2228.05	2103.02	2319.32
ler35d_block1_2_1_X.tif	35d	_X.tif	6015.05	6183.46	6471.49	0.597881	-1.34563	26339428	17440	2903.51	2550.66	3343.1
ler35d_block1_3_1_X.tif	35d	_X.tif	6171.42	6523.21	4882.43	0.222574	-0.74805	18225797	14348	2407.64	2260.39	2563.34
ler35d_block1_4_1_X.tif	35d	_X.tif	6191.57	6186.33	5667.03	0.413181	0.0963775	22920551	16362	2702.2	2498.54	2930.49
ler35d_block1_5_1_X.tif	35d	_X.tif	6156.27	6089.01	5263.97	0.47148	1.03151	19175466	14730	2475.22	2258.46	2702.69
ler35d_block1_6_1_X.tif	35d	_X.tif	5926.79	6258.25	5295.54	0.471324	0.768769	19367809	14571	2489.63	2220.73	2710.19
ler35d_block1_8_1_X.tif	35d	_X.tif	6124.11	6378.42	5521.23	0.396243	1.29606	21956358	15442	2645.48	2488.26	2815.26
ler35d_block1_9_1_X.tif	35d	_X.tif	6131.78	6176.41	5206.95	0.251649	-1.22073	20582508	14808	2560.34	2404.85	2670.56
ler35d_block2_1_1_X.tif	35d	_X.tif	6145.05	6145.13	14206.1	0.0121845	-0.884734	150576943	32768	6196.05	3326.93	10449
ler35d_block2_10_1_X.tif	35d	_X.tif	4936.52	5075.1	4767.8	0.260677	-0.912763	17218393	13691	2340.51	2251.51	2485.75
ler35d_block2_11_1_X.tif	35d	_X.tif	4987.95	5163.53	4447.58	0.210008	-0.0635857	15164886	12764	2197.9	2051.26	2324.36
ler35d_block2_12_1_X.tif	35d	_X.tif	5588.24	5362.1	5048.52	0.502843	-0.803225	17245542	13675	2347.28	2016.95	2588.97
ler35d_block2_2_1_X.tif	35d	_X.tif	4974.17	5043.89	5263.6	0.504359	0.643007	18754291	14363	2448.4	2195.62	2698.24
ler35d_block2_3_1_X.tif	35d	_X.tif	5261.15	5154.93	4762.68	0.194103	-0.351267	17453857	13819	2356.44	2243.15	2445.3
ler35d_block2_4_1_X.tif	35d	_X.tif	5071.73	5102.1	4682.14	0.25889	0.114878	16608291	13408	2299.42	2165.86	2434.82
ler35d_block2_5_1_X.tif	35d	_X.tif	5128.22	5142.77	4572.88	0.357814	0.399461	15306142	12903	2207.39	2088.26	2344
ler35d_block2_6_1_X.tif	35d	_X.tif	5213.96	5266.26	5650.53	0.423733	0.313485	22680110	15942	2686.62	2468.44	2908.76
ler35d_block2_7_1_X.tif	35d	_X.tif	5225.24	5301.02	4658.35	0.209797	0.433518	16647810	13463	2301.82	2212.25	2416.02
ler35d_block2_8_1_X.tif	35d	_X.tif	5148.85	5091.83	5205.11	0.316291	-0.550302	20160745	14896	2532.45	2338.12	2726.39
ler35d_block2_9_1_X.tif	35d	_X.tif	5068.54	5250.48	4977.74	0.388693	0.580727	17893502	13840	2390.2	2190.39	2607.65
ler35d_block3_1_1_X.tif	35d	_X.tif	6327.99	5210.77	7796.97	0.712689	1.21919	33455405	19383	3293.38	2631.95	3985.26
ler35d_block3_10_1_X.tif	35d	_X.tif	4780.98	4734.45	6030.51	0.428071	0.764467	25773253	16941	2869.21	2629.12	3133.59
ler35d_block3_11_1_X.tif	35d	_X.tif	5215.99	5264.06	5107.43	0.361994	0.530847	19078294	14250	2464.89	2321.89	2613.04
ler35d_block3_2_1_X.tif	35d	_X.tif	6162.75	6314.87	5464.93	0.331112	1.04464	22102836	15406	2653.05	2476.49	2836.44
ler35d_block3_3_1_X.tif	35d	_X.tif	6268.99	6136.97	4989.55	0.476956	0.439517	17173693	13825	2341.62	2105.48	2565.95
ler35d_block3_4_1_X.tif	35d	_X.tif	5996.44	5966.51	5921.2	0.422483	-1.15057	24897628	16394	2818.89	2589.75	3078.18
ler35d_block3_5_1_X.tif	35d	_X.tif	6433.86	5951.94	5066.37	0.337292	0.783122	18949645	14433	2455.78	2330.53	2614.96
ler35d_block3_6_1_X.tif	35d	_X.tif	6338.93	6218.65	5173.89	0.687602	-0.0209656	15227234	13364	2208.66	1815.52	2636.28
ler35d_block3_7_1_X.tif	35d	_X.tif	6103.86	5974.01	5000.85	0.320032	-0.508938	18578559	14295	2431.84	2269.87	2555.47
ler35d_block3_8_1_X.tif	35d	_X.tif	6243.34	6218.1	5494.73	0.265989	0.615331	22821724	15820	2693.33	2524.62	2821.5
ler35d_block3_9_1_X.tif	35d	_X.tif	6292.15	6517.73	6107.64	0.595465	0.464456	23524511	16139	2749.5	2432.67	3196.76
