# Supplementary material for: Automated quantitative histology reveals vascular morphodynamics during Arabidopsis hypocotyl secondary growth
Source: eLife. 2014 Feb 11;3:e01567. doi: 10.7554/eLife.01567 (PMC3917233; doi:10.7554/eLife.01567)
Supplement: Supplementary file 4. — The normalized values of the phenoprints (Figure 2B) used for PCA. DOI: http://dx.doi.org/10.7554/eLife.01567.015 [file elife01567s004.xlsx]

## Sheet: colLer_phenoprint_norm_revised_
Normalized values of the phenoprints from Fig. 2B that were used in the PCA
	Ler_15d	Ler_20d	Ler_25d	Ler_30d	Ler_35d	Col_15d	Col_20d	Col_25d	Col_30d	Col_35d
medSectArea	0.00587587	0.0379802	0.205007	0.423281	0.554674	0.0368308	0.168572	0.42252	0.779469	1
medianXylOccup	0.68209	0.43448	0.486526	0.781805	1	0.2657	0.177834	0.234627	0.384516	0.62628
medianCellCount	0.0143456	0.0558927	0.288071	0.492331	0.608365	0.0486923	0.180203	0.373814	0.717198	1
propXyl	1	0.275537	0.687729	0.472474	0.820893	0.559625	0.341838	0.46578	0.397941	0.513537
propFibers	0	0	0.0628155	0.608668	1	0	0	0	0.29473	0.859957
propPhlo	0.428746	0.287194	0.65635	0.666513	0.407289	0.719998	0.843012	1	0.764432	0.507528
propCamb	0.536118	1	0.357887	0.239074	0.237735	0.399099	0.350312	0.14225	0.300385	0.27121
BiPval	1	2.54782e-05	0	0	0	0.00525672	0.000342408	0	0	0
